# Supplementary material for: Na0.4MnO2/MXene nanocomposites as cathodes for high-performance aqueous zinc-ion batteries
Source: Royal Society of Chemistry journal article supplement (doi:10.1039/d4ra02815e), 2024-01-01
Supplement: d4ra02815e1.pdf [file d4ra02815e1.pdf]

## **Na<sub>0.4</sub>MnO<sub>2</sub>/MXene nanocomposites as cathodes for high-performance aqueous zinc-ion batteries**

Guangquan Si<sup>a\*</sup>, Wei Li<sup>b\*</sup>, Taijiang Li<sup>b</sup>, Caixia Wang<sup>b</sup>, Qi Sun<sup>b</sup>

<sup>a</sup> Huaneng Power International, Inc., Beijing 100031, China

<sup>b</sup> Xi'an Thermal Power Research Institute Co., Ltd., Xi'an 710054, China

\*Corresponding author.

E-mail address: [liwei@tpri.com.cn](mailto:liwei@tpri.com.cn)

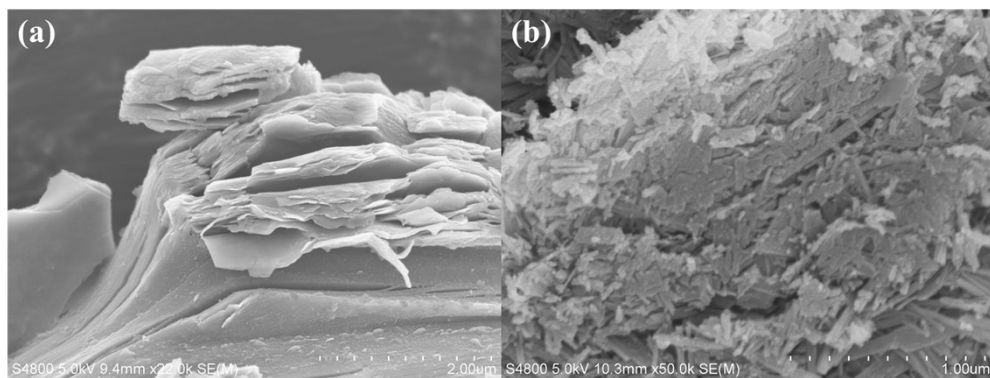

**Fig. 1.** SEM images of the (a) MXene and (b) MnO<sub>2</sub>.

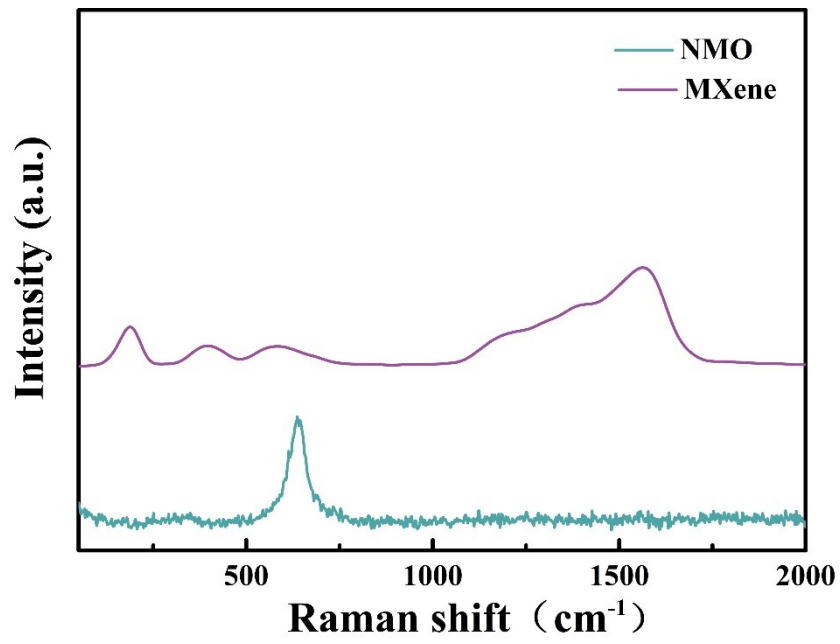

**Fig. 2.** Raman spectra of the  $\text{Na}_{0.4}\text{MnO}_2$  (NMO) and MXene.

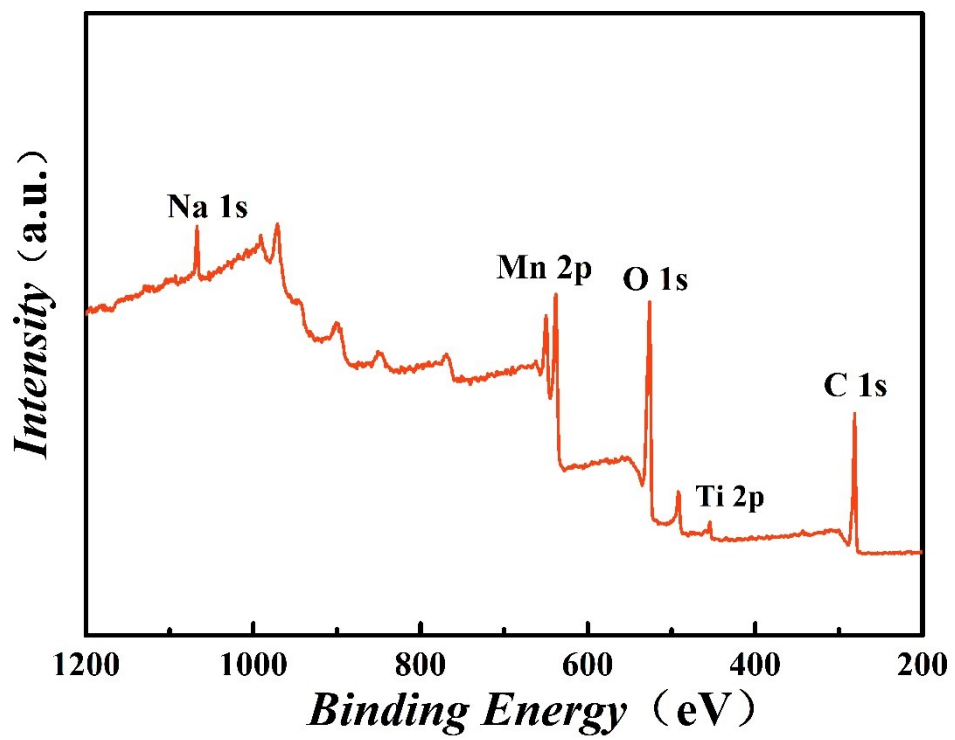

**Fig. 3.** XPS spectra of the NMO@MXene.

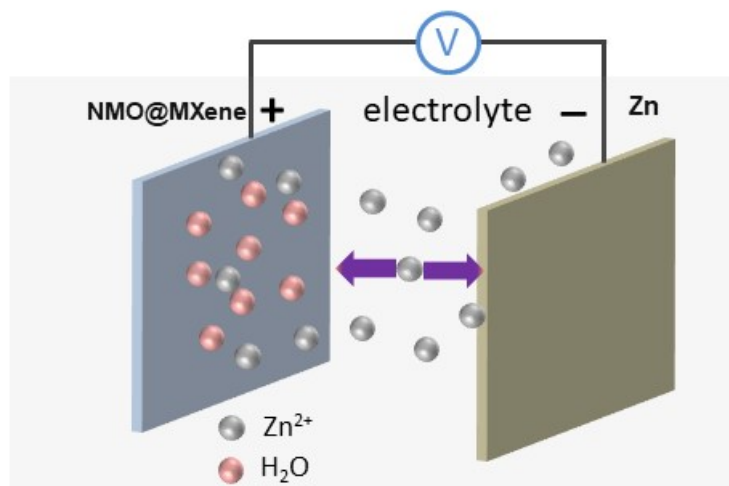

**Fig. 4** Schematic illustration of NMO@MXene aqueous rechargeable battery.

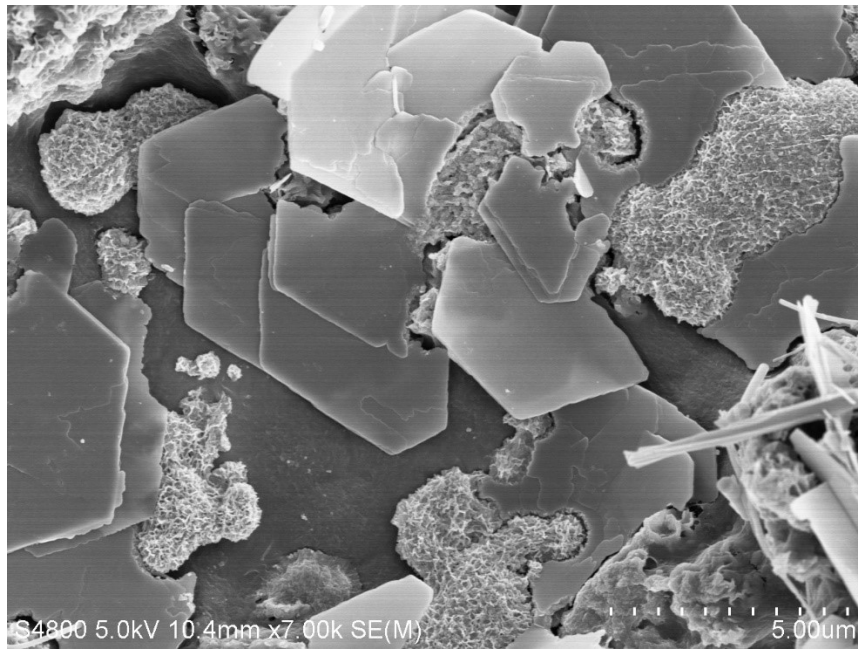

**Fig. 5** SEM images of NMO@MXene after 200 cycles.

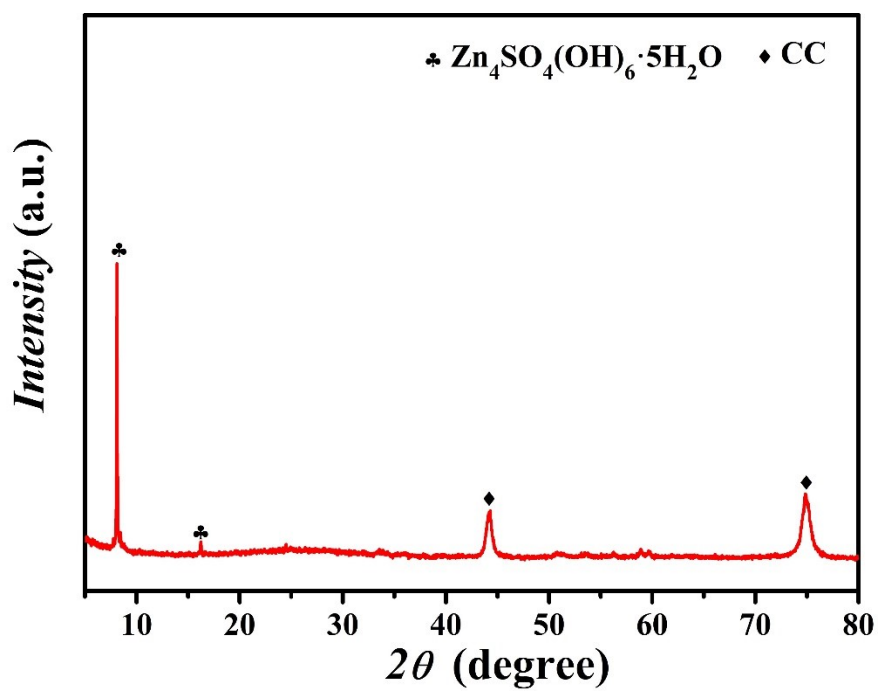

**Fig. 6** XRD pattern of NMO@MXene after 200 cycles.

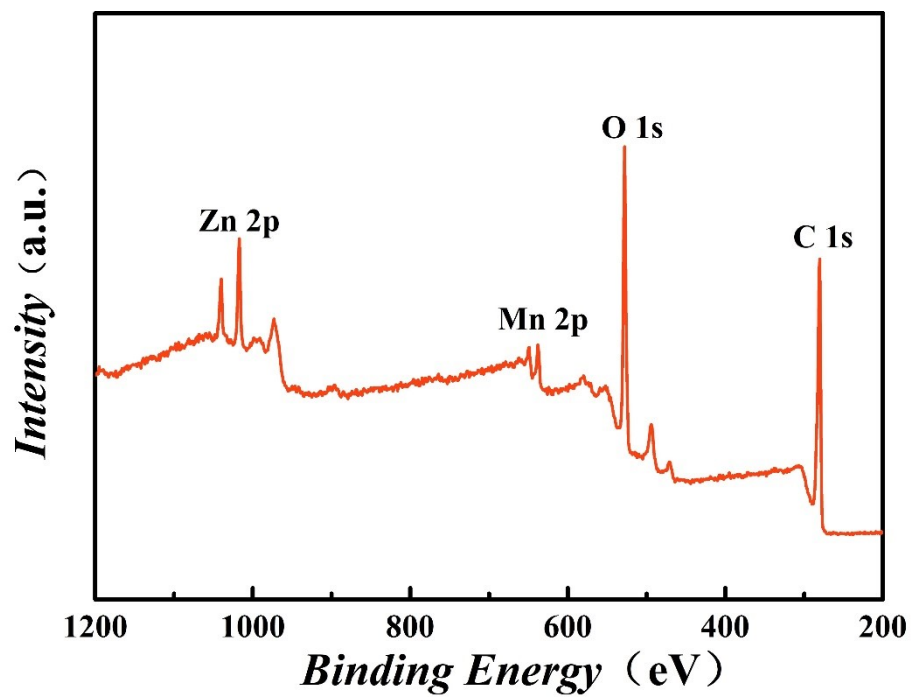

Fig. 7 XPS of NMO@MXene after 200 cycles.



**Table S1.** Performance comparison of aqueous ZIBs with manganese oxide-based materials as cathodes.

| Cathode material                     | Electrolyte                                                   | Specific capacity                                      | Capacity retention                                          | Ref.         |
|--------------------------------------|---------------------------------------------------------------|--------------------------------------------------------|-------------------------------------------------------------|--------------|
| NMO@MXene                            | 2 M ZnSO <sub>4</sub> + 0.2 M MnSO <sub>4</sub>               | 324.6 mA h g <sup>-1</sup> at<br>0.2 A g <sup>-1</sup> | 91.4% after 1000 cycles<br>at 2 A g <sup>-1</sup>           | This<br>work |
| F-MO                                 | 2 M ZnSO <sub>4</sub> + 0.2 M MnSO <sub>4</sub>               | 288 mA h g <sup>-1</sup> at<br>0.1 A g <sup>-1</sup>   | 96% after 200 cycles at<br>0.2 A g <sup>-1</sup>            | 1            |
| MnO <sub>2</sub> @MXene              | 2 M ZnSO <sub>4</sub> + 0.2 M MnSO <sub>4</sub>               | 184 mA h g <sup>-1</sup> at<br>0.05 A g <sup>-1</sup>  | 84.5% after 1000 cycles<br>at 0.1 A g <sup>-1</sup>         | 2            |
| HCM                                  | 2 M ZnSO <sub>4</sub> + 0.3 M MnSO <sub>4</sub>               | 341 mA h g <sup>-1</sup> at<br>0.2 A g <sup>-1</sup>   | 87% after 3500 cycles at<br>2 A g <sup>-1</sup>             | 3            |
| ε- MnO <sub>2</sub> @N               | 2 M ZnSO <sub>4</sub> + 0.5 M MnSO <sub>4</sub>               | 183.4 mA h g <sup>-1</sup> at<br>0.5 A g <sup>-1</sup> | 83% after 1000 cycles at<br>5 A g <sup>-1</sup>             | 4            |
| δ- MnO <sub>2</sub>                  | 1 M ZnSO <sub>4</sub>                                         | 252 mA h g <sup>-1</sup> at<br>0.083 A g <sup>-1</sup> | 43% after 100 cycles at<br>0.083 A g <sup>-1</sup>          | 5            |
| Mn <sub>3</sub> O <sub>4</sub> /CP   | 2 M ZnSO <sub>4</sub> + 0.2 M MnSO <sub>4</sub>               | 201 mA h g <sup>-1</sup> at<br>0.3 A g <sup>-1</sup>   | No decreasing after 200<br>cycles at 1 A g <sup>-1</sup>    | 6            |
| ZnMn <sub>2</sub> O <sub>4</sub> /NG | 1 M ZnSO <sub>4</sub> + 0.05 M MnSO <sub>4</sub>              | 232 mA h g <sup>-1</sup> at<br>0.1 A g <sup>-1</sup>   | 97.4% after 2500 cycles<br>at 1 A g <sup>-1</sup>           | 7            |
| Ocu-Mn <sub>2</sub> O <sub>3</sub>   | 3 M ZnSO <sub>4</sub> + 0.1 M MnSO <sub>4</sub>               | 241 mA h g <sup>-1</sup> at<br>0.1 A g <sup>-1</sup>   | 88% after 600 cycles at<br>1 A g <sup>-1</sup>              | 8            |
| δ-NMOH                               | 2 M ZnSO <sub>4</sub> + 0.2 M MnSO <sub>4</sub>               | 232 mA h g <sup>-1</sup> at<br>2 C                     | Nearly 100% after 2000<br>cycles at 10 C                    | 9            |
| ZMO/CNTs                             | 1 M ZnSO <sub>4</sub> + 0.1 M MnSO <sub>4</sub>               | 220.3 mA h g <sup>-1</sup> at<br>0.1 A g <sup>-1</sup> | 97.0% after 2000 cycles<br>at 3 A g <sup>-1</sup>           | 10           |
| Mn <sub>3</sub> O <sub>4</sub> @HCFs | 2 M ZnSO <sub>4</sub> + 0.15 M MnSO <sub>4</sub>              | 215.8 mA h g <sup>-1</sup> at<br>0.3 A g <sup>-1</sup> | No decreasing after<br>1300 cycles at 0.4 A g <sup>-1</sup> | 11           |
| Fe/α-MnO <sub>2</sub> @PPy           | 2 M ZnSO <sub>4</sub> + 0.1 M MnSO <sub>4</sub>               | 270 mA h g <sup>-1</sup> at<br>0.1 A g <sup>-1</sup>   | 71.4.% after 100 cycles<br>at 0.1 A g <sup>-1</sup>         | 12           |
| α-MnO <sub>2</sub> /CNT              | 2 M ZnSO <sub>4</sub> + 0.1 M MnSO <sub>4</sub>               | 296 mA h g <sup>-1</sup> at<br>0.2 A g <sup>-1</sup>   | No decreasing after 100<br>cycles at 0.2 A g <sup>-1</sup>  | 13           |
| HMs                                  |                                                               |                                                        |                                                             |              |
| Ti-MnO <sub>2</sub>                  | 3 M Zn(CF <sub>3</sub> SO <sub>3</sub> ) <sub>2</sub> + 0.1 M | 259 mA h g <sup>-1</sup> at                            | 80% after 4000 cycles at                                    | 14           |

---

**References**

1. D. Wang, Z. Liu, X.-W. Gao, Q. Gu, L. Zhao and W.-B. Luo, *Journal of Energy Storage*, 2023, **72**, 108740.
2. L. Wu, Y. Mei, Y. Liu, W. Xu, M. Zhang, Y. Dong and Z.-S. Wu, *Chemical Engineering Journal*, 2023, **459**, 141662.
3. S. Luo, J. Xu, B. Yuan, L. Chen, L. Xu, R. Zheng, Y. Wang, M. Zhang, Y. Lu and Y. Luo, *Carbon*, 2023, **214**, 118334.
4. Y. Zhang, Y. Liu, Z. Liu, X. Wu, Y. Wen, H. Chen, X. Ni, G. Liu, J. Huang and S. Peng, *Journal of Energy Chemistry*, 2022, **64**, 23-32.
5. M. H. Alfaruqi, J. Gim, S. Kim, J. Song, D. T. Pham, J. Jo, Z. Xiu, V. Mathew and J. Kim, *Electrochemistry Communications*, 2015, **60**, 121-125.
6. A. Dhiman and D. G. Ivey, *Batteries & Supercaps*, 2020, **3**, 293-305.
7. L. Chen, Z. Yang, H. Qin, X. Zeng and J. Meng, *Journal of power sources*, 2019, **425**, 162-169.
8. N. Liu, X. Wu, Y. Yin, A. Chen, C. Zhao, Z. Guo, L. Fan and N. Zhang, *ACS applied materials & interfaces*, 2020, **12**, 28199-28205.
9. D. Wang, L. Wang, G. Liang, H. Li, Z. Liu, Z. Tang, J. Liang and C. Zhi, *ACS nano*, 2019, **13**, 10643-10652.
10. F. Gao, B. Mei, X. Xu, J. Ren, D. Zhao, Z. Zhang, Z. Wang, Y. Wu, X. Liu and Y. Zhang, *Chemical Engineering Journal*, 2022, **448**, 137742.
11. J. Long, Z. Yang, F. Yang, J. Cuan and J. Wu, *Electrochimica Acta*, 2020, **344**,

136155.

12. J.-W. Xu, Q.-L. Gao, Y.-M. Xia, X.-S. Lin, W.-L. Liu, M.-M. Ren, F.-G. Kong, S.-J. Wang and C. Lin, *Journal of Colloid and Interface Science*, 2021, **598**, 419-429.
13. Y. Liu, X. Chi, Q. Han, Y. Du, J. Huang, Y. Liu and J. Yang, *Journal of Power Sources*, 2019, **443**, 227244.
14. S. Lian, C. Sun, W. Xu, W. Huo, Y. Luo, K. Zhao, G. Yao, W. Xu, Y. Zhang and Z. Li, *Nano Energy*, 2019, **62**, 79-84.
